# Supplementary material for: Critical Review of Tuberculosis Diagnosis in Children from Papua New Guinea Presenting to Health Facilities in the Torres Strait Islands, Australia
Source: MDPI journal article supplement (doi:10.3390/microorganisms11122947), 2023-12-08
Supplement: s1 [file s1]

## Article

# Critical review of tuberculosis diagnosis in children from Papua New Guinea presenting to health facilities in the Torres Strait Islands, Australia

## Supplementary Materials

| TABLE 1. Keith Edwards Score for Diagnosis of Tuberculosis in Children                                     |       |                    |                        |
|------------------------------------------------------------------------------------------------------------|-------|--------------------|------------------------|
| Feature                                                                                                    | Score |                    |                        |
|                                                                                                            | 0     | 1                  | 3                      |
| Duration of illness (weeks)                                                                                | < 2   | 2-4                | > 4                    |
| Nutrition (% of weight for age)                                                                            | > 80  | 60-80              | < 60                   |
| Family history of tuberculosis                                                                             | None  | Reported by family | Proven sputum positive |
| Score for Other Features if Present                                                                        |       |                    |                        |
| Feature                                                                                                    | Score |                    |                        |
| Unexplained fever, night sweats, no response to malaria treatment                                          | 2     |                    |                        |
| Positive tuberculin test                                                                                   | 3     |                    |                        |
| Lymph nodes: large, painless, firm, soft sinus in neck/axilla                                              | 3     |                    |                        |
| Malnutrition, not improving after 4 weeks                                                                  | 3     |                    |                        |
| Central nervous system : change in temperament, fits with or without abnormal cerebrospinal fluid findings | 3     |                    |                        |
| Joint swelling, bone swelling, sinuses                                                                     | 3     |                    |                        |
| Unexplained abdominal mass, ascites                                                                        | 3     |                    |                        |
| Angle deformity of spine                                                                                   | 4     |                    |                        |
| A score of 7 or more is indicative of tuberculosis                                                         |       |                    |                        |

**Figure S1.** Keith Edwards Score for Diagnosis of Tuberculosis in Children 1987<sup>12</sup>

## Approach to TB diagnosis in HIV-uninfected child

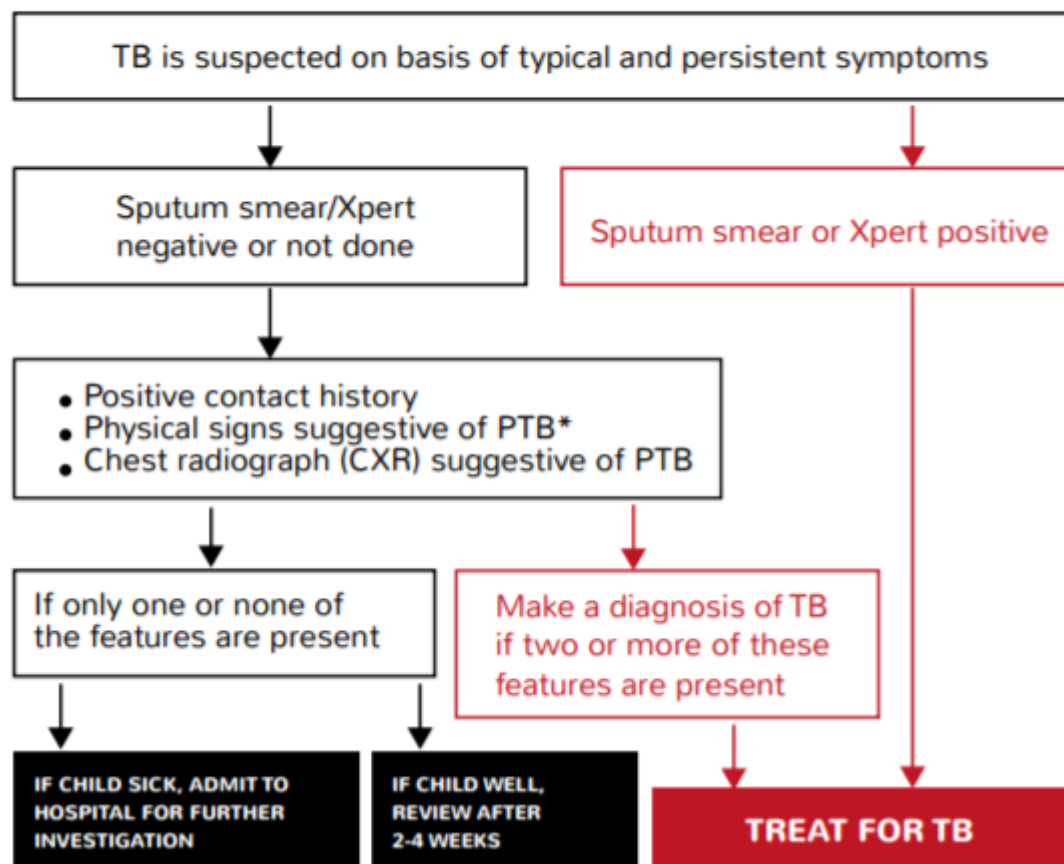

**Figure S2.** The Union Desk Guide 3<sup>rd</sup> Edition 2016<sup>10</sup>

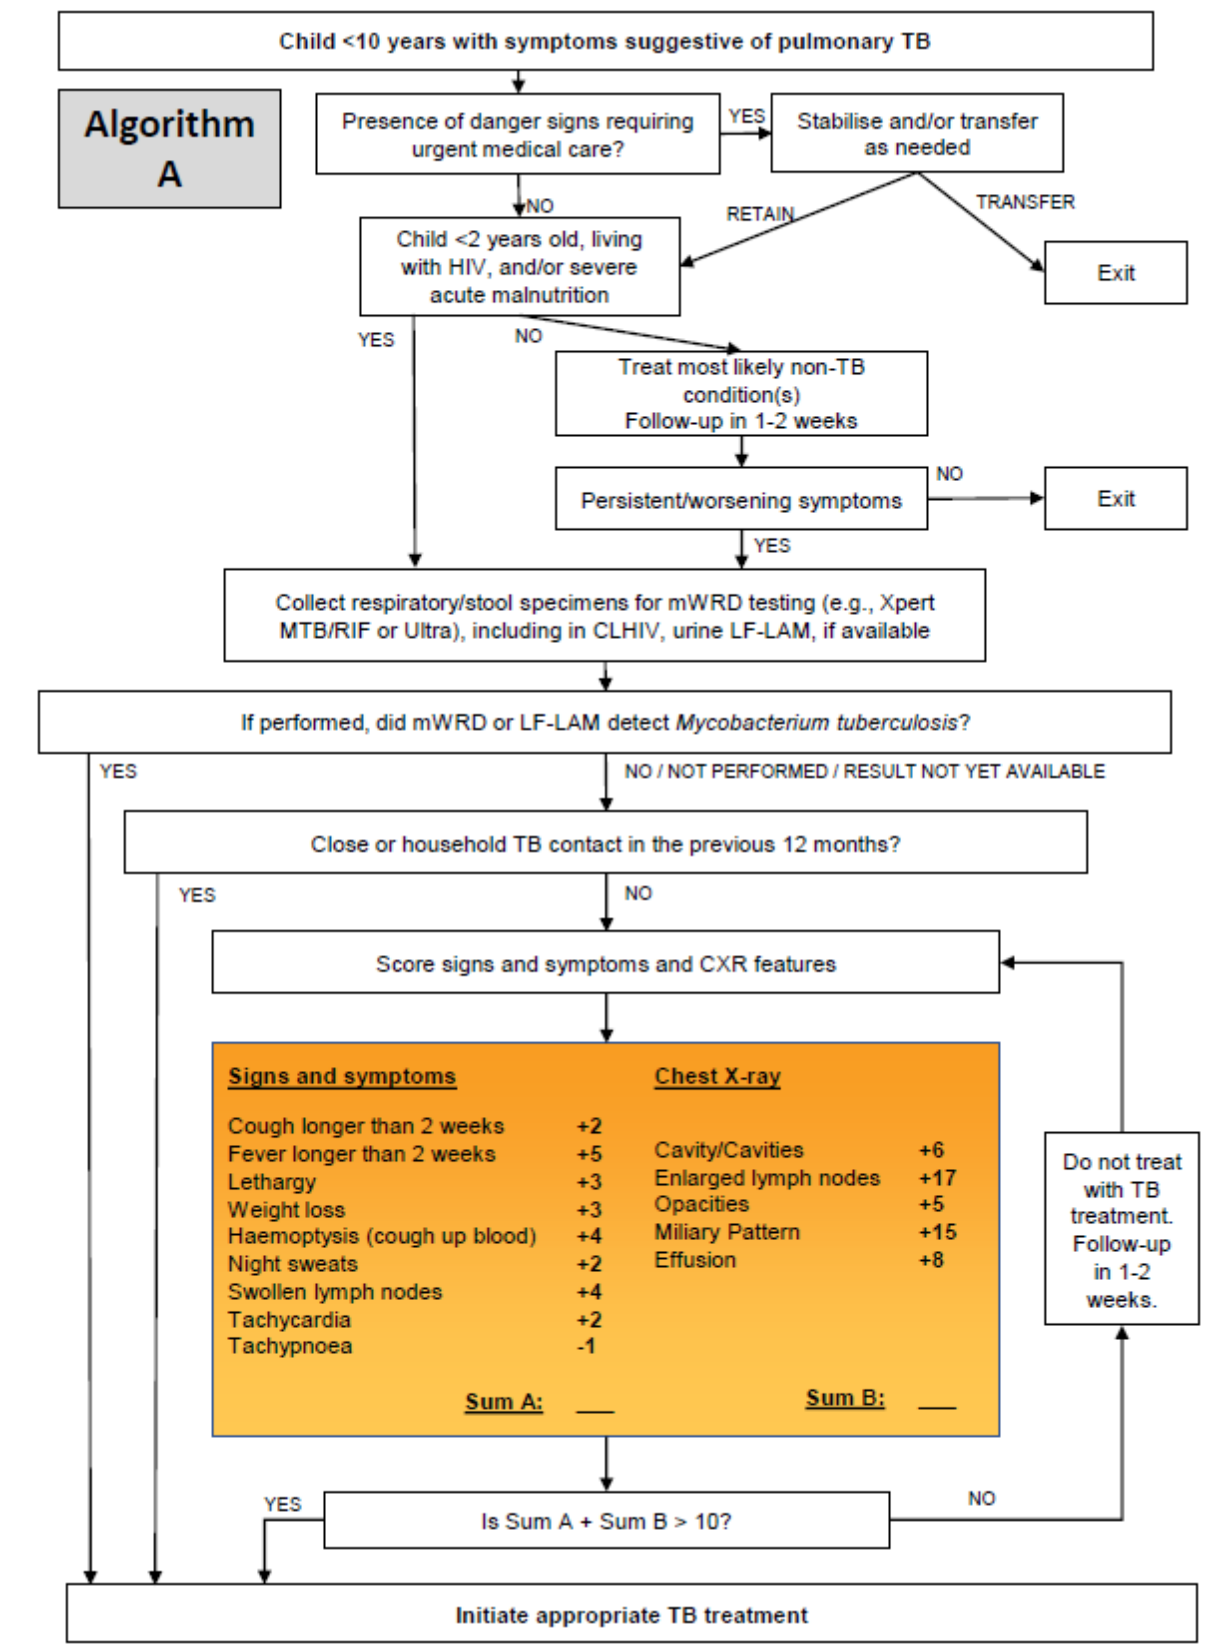

**Figure S3.** New World Health Organization Paediatric TB algorithm 2022<sup>13</sup>

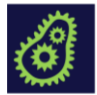**Table S1.** Description of established and modified scoring in Keith Edwards TB Score, The Union Desk Guide and the New WHO Algorithm

1

|                        | KEITH<br>EDWARDS TB<br>SCORE (1987)                                                       | MODIFIED<br>KEITH<br>EDWARDS TB<br>SCORE | UNION DESK<br>GUIDE (2016)       | MODIFIED<br>UNION DESK<br>GUIDE  | NEW WHO<br>ALGORITHM<br>(2022)   | MODIFIED WHO<br>ALGORITHM                          |
|------------------------|-------------------------------------------------------------------------------------------|------------------------------------------|----------------------------------|----------------------------------|----------------------------------|----------------------------------------------------|
| DIAGNOSTIC<br>FEATURE  | SCORING SYSTEM (POINTS-<br>BASED)                                                         |                                          | DIAGNOSTIC GUIDE                 |                                  | OPERATIONAL ALGORITHM            |                                                    |
| COUGH                  | 0 - <2 weeks                                                                              | 0 - <2 weeks                             |                                  |                                  |                                  |                                                    |
|                        | 1 – 2-4 weeks                                                                             | 1 – 2-4 weeks                            | 0 – ≤2 weeks                     | 0 – ≤2 weeks                     | 0 – ≤2 weeks                     | 0 – ≤2 weeks                                       |
|                        | 3 - >4 weeks                                                                              | 3 - >4 weeks                             | 1 – >2 weeks                     | 1 – >2 weeks                     | 2 – >2 weeks                     | 2 – >2 weeks                                       |
| FEVER                  | 0 - <2 weeks                                                                              |                                          |                                  |                                  |                                  |                                                    |
|                        | 1 – 2-4 weeks                                                                             | 0 – ≤2 weeks                             | 0 – ≤2 weeks                     | 0 – ≤2 weeks                     | 0 – ≤2 weeks                     | 0 – ≤2 weeks                                       |
|                        | 3 - >4 weeks                                                                              | 2 – >2 weeks                             | 1 – >2 weeks                     | 1 – >2 weeks                     | 5 – >2 weeks                     | 5 – >2 weeks                                       |
| WEIGHT LOSS            | 3 - malnutrition<br>not improving<br>after four weeks<br>of nutritional<br>rehabilitation | Excluded **                              | 0 – not reported<br>1 – reported | 0 – not reported<br>1 – reported | 0 – not reported<br>3 – reported | 0 – not reported<br>3 – reported                   |
| NIGHT SWEATS           | 0 - <2 weeks                                                                              |                                          |                                  |                                  |                                  |                                                    |
|                        | 1 – 2-4 weeks                                                                             | 0 – ≤2 weeks                             | 0 – ≤2 weeks                     | 0 – ≤2 weeks                     | 0 – not reported                 | 0 – not reported                                   |
|                        | 3 - >4 weeks                                                                              | 2 – >2 weeks                             | 1 – >2 weeks                     | 1 – >2 weeks                     | 2 – reported                     | 2 – reported                                       |
| SWOLLEN LYMPH<br>NODES | 0 – not present                                                                           | 0 – not present                          |                                  | 0 – not present                  | 0 – not reported                 | 0 – not reported                                   |
|                        | 3 – present                                                                               | 3 – present                              | Not specified                    | 1 – present                      | 4 – reported                     | 4 – reported                                       |
| TB CONTACT             | 0 – no family<br>history of TB                                                            | 0 – no family<br>history of TB           | 0 – no TB contact<br>history     | 0 – no TB contact<br>history     | 0 – no TB contact<br>history in  | 0 – no TB contact history in<br>previous 12 months |

|                          | KEITH<br>EDWARDS TB<br>SCORE (1987)                                                                | MODIFIED<br>KEITH<br>EDWARDS TB<br>SCORE                                                                            | UNION DESK<br>GUIDE (2016) | MODIFIED<br>UNION DESK<br>GUIDE | NEW WHO<br>ALGORITHM<br>(2022)                                                                                                                                                                               | MODIFIED WHO<br>ALGORITHM                                                                                                                                         |
|--------------------------|----------------------------------------------------------------------------------------------------|---------------------------------------------------------------------------------------------------------------------|----------------------------|---------------------------------|--------------------------------------------------------------------------------------------------------------------------------------------------------------------------------------------------------------|-------------------------------------------------------------------------------------------------------------------------------------------------------------------|
| DIAGNOSTIC<br>FEATURE    | SCORING SYSTEM (POINTS-<br>BASED)                                                                  |                                                                                                                     | DIAGNOSTIC GUIDE           |                                 | OPERATIONAL ALGORITHM                                                                                                                                                                                        |                                                                                                                                                                   |
|                          | 1 – contact with<br>sputum smear<br>negative TB<br>3 – contact with<br>sputum smear<br>positive TB | 3* – known TB<br>contact of either<br>sputum smear<br>positive or<br>negative                                       | 1 – TB contact<br>history  | 1 – TB contact<br>history       | previous 12<br>months<br>0 – TB contact<br>history in<br>previous 12<br>months without<br>persistent<br>symptoms<br>Treat - TB contact<br>history in<br>previous 12<br>months with<br>persistent<br>symptoms | 0 – TB contact history in<br>previous 12 months without<br>persistent symptoms<br>Treat - TB contact history in<br>previous 12 months with<br>persistent symptoms |
| WEIGHT-FOR-<br>AGE (WFA) | 0 - >80% expected<br>WFA<br>1 - 60-80% WFA<br>3 - <60% WFA                                         | 0 - ≥15 <sup>th</sup> WFA<br>percentile<br>1 - 3-14 <sup>th</sup><br>percentile<br>3 - < 3 <sup>rd</sup> percentile | N/A                        | N/A                             | Severe Acute<br>Malnutrition –<br>eligible to<br>progress to<br>through until the<br>end of the<br>algorithm                                                                                                 | < 3 <sup>rd</sup> percentile - eligible to<br>progress to through until the<br>end of the algorithm                                                               |

|                             | KEITH<br>EDWARDS TB<br>SCORE (1987)     | MODIFIED<br>KEITH<br>EDWARDS TB<br>SCORE | UNION DESK<br>GUIDE (2016)                                         | MODIFIED<br>UNION DESK<br>GUIDE                                    | NEW WHO<br>ALGORITHM<br>(2022)                                                                                                 | MODIFIED WHO<br>ALGORITHM                                                                                                |
|-----------------------------|-----------------------------------------|------------------------------------------|--------------------------------------------------------------------|--------------------------------------------------------------------|--------------------------------------------------------------------------------------------------------------------------------|--------------------------------------------------------------------------------------------------------------------------|
| DIAGNOSTIC<br>FEATURE       | SCORING SYSTEM (POINTS-<br>BASED)       |                                          | DIAGNOSTIC GUIDE                                                   |                                                                    | OPERATIONAL ALGORITHM                                                                                                          |                                                                                                                          |
| HIV                         | N/A                                     | N/A                                      | N/A***                                                             | N/A                                                                | HIV positive -<br>eligible to<br>progress to<br>through until the<br>end of the<br>algorithm                                   | HIV positive - eligible to<br>progress to through until the<br>end of the algorithm                                      |
| TB INFECTION                | 3 – positive<br>tuberculin skin<br>test | Excluded                                 | N/A                                                                | N/A                                                                | N/A                                                                                                                            | N/A                                                                                                                      |
| CHEST X-RAY<br>FINDINGS     | N/A                                     | N/A                                      | 0 – Not suggestive<br>of TB or nor done<br>1 – Suggestive of<br>TB | 0 – Not suggestive<br>of TB or nor done<br>1 – Suggestive of<br>TB | 0 – Not suggestive<br>6 – Cavities<br>17 – Enlarged<br>lymph nodes<br>5 – Opacities<br>15 – Miliary<br>pattern<br>8 – Effusion | 0 – Not suggestive<br>6 – Cavities<br>17 – Enlarged lymph nodes<br>5 – Opacities<br>15 – Miliary pattern<br>8 – Effusion |
| SPECIMEN FOR<br>SMEAR/XPERT | N/A                                     | N/A                                      | 0 – Sputum<br>smear/ Xpert<br>negative or not<br>done              | 0 – Sputum<br>smear/<br>Xpert/culture<br>negative or not<br>done   | 0 – Sputum<br>smear/ Xpert<br>negative or not<br>done                                                                          | 0 – Xpert/culture negative or<br>not done<br>Treat - Xpert/culture positive                                              |

|                                |                                   | KEITH<br>EDWARDS TB<br>SCORE (1987) | MODIFIED<br>KEITH<br>EDWARDS TB<br>SCORE | UNION DESK<br>GUIDE (2016)              | MODIFIED<br>UNION DESK<br>GUIDE              | NEW WHO<br>ALGORITHM<br>(2022) | MODIFIED WHO<br>ALGORITHM |
|--------------------------------|-----------------------------------|-------------------------------------|------------------------------------------|-----------------------------------------|----------------------------------------------|--------------------------------|---------------------------|
| DIAGNOSTIC<br>FEATURE          | SCORING SYSTEM (POINTS-<br>BASED) |                                     | DIAGNOSTIC GUIDE                         |                                         | OPERATIONAL ALGORITHM                        |                                |                           |
|                                |                                   |                                     | 1 – Sputum smear<br>or Xpert positive    | 1 – Sputum<br>smear/<br>Xpert/culture + | Treat – Sputum<br>smear or Xpert<br>positive |                                |                           |
| CNS                            | 3                                 | 3                                   | N/A                                      | N/A                                     | N/A                                          | N/A                            |                           |
| SKELETAL                       | 3                                 | 3                                   | N/A                                      | N/A                                     | N/A                                          | N/A                            |                           |
| ABDOMINAL                      | 3                                 | 3                                   | N/A                                      | N/A                                     | N/A                                          | N/A                            |                           |
| ANGLE<br>DEFORMITY OF<br>SPINE | 4                                 | 4                                   | N/A                                      | N/A                                     | N/A                                          | N/A                            |                           |
| SCORE<br>INTERPRETATION        | Treat if score is ≥7              |                                     | Treat if ≥2 features are present         |                                         | Treat if score is >10                        |                                |                           |

CNS: Central nervous system: change in temperament, fits +/- abnormal cerebrospinal fluid findings2

Skeletal: Joint swelling, bone swelling, sinuses3

Abdominal: Unexplained abdominal mass, ascites4
